# Supplementary material
Source: PubMed Central journal article supplement (PMC1458815)

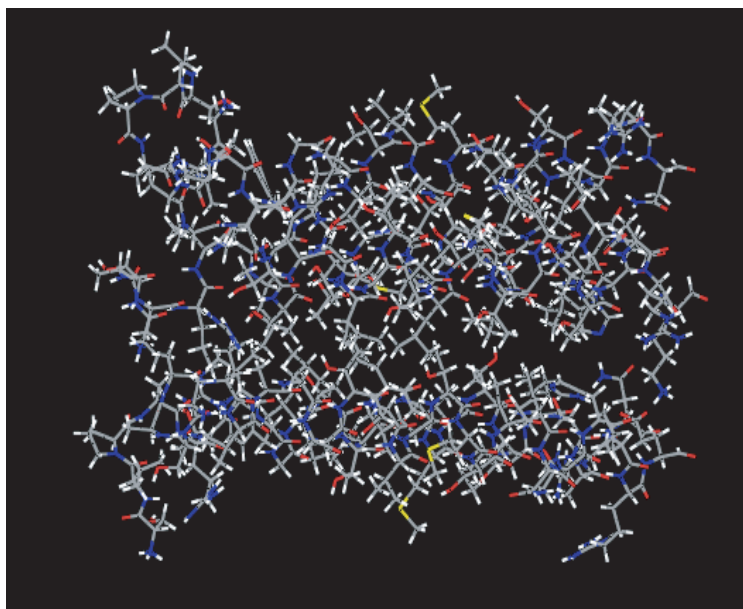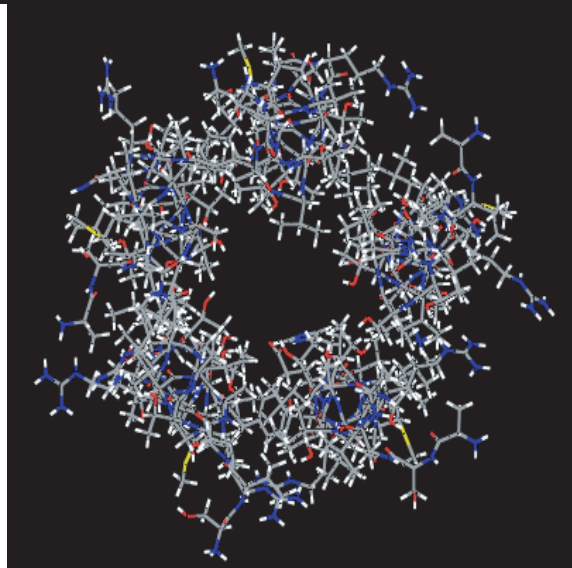

Supplement: pnas_0600370103_1.pdf [file pnas_0600370103_1.pdf]

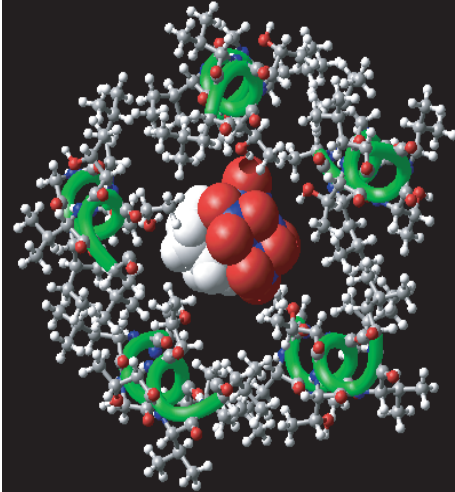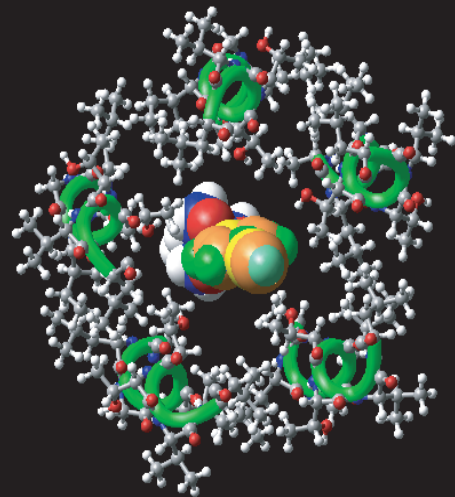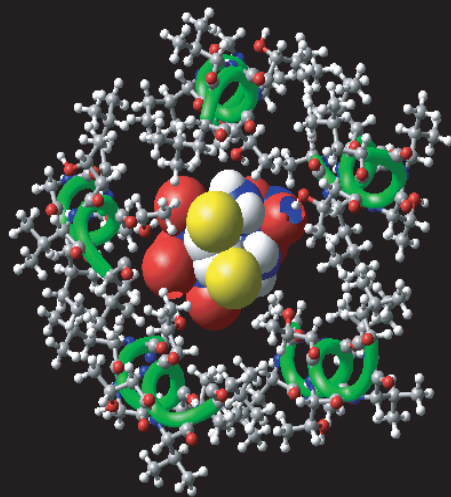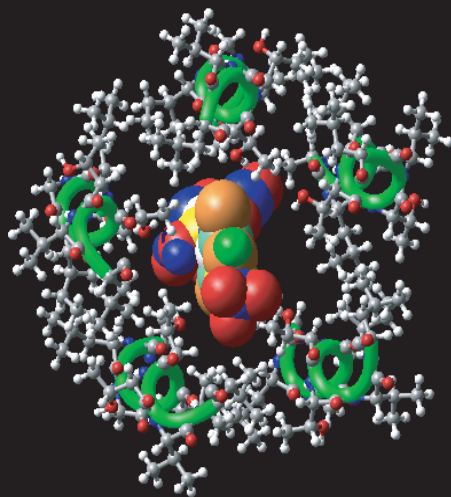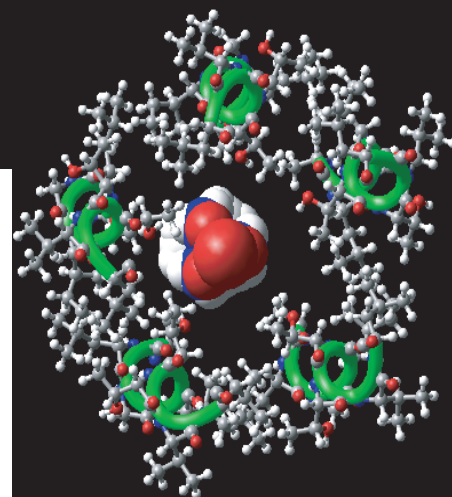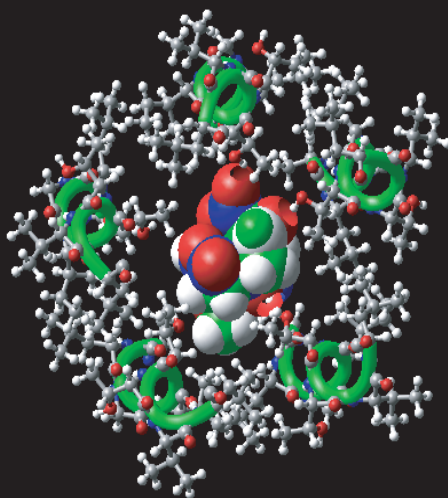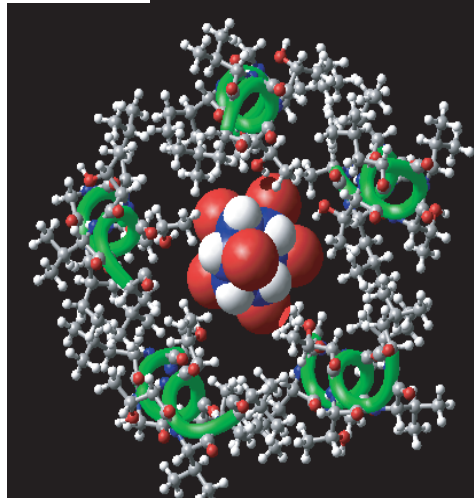

Supplement: pnas_0600370103_2.pdf [file pnas_0600370103_2.pdf]
